# Supplementary material for: Sublingual immune cell clusters and dendritic cell distribution in the oral cavity
Source: PubMed Central journal article supplement (PMC11601585; doi:10.1172/jci.insight.167373), 2024-10-01
Supplement: jciinsight-9-167373-s194.pdf [file jciinsight-9-167373-s194.pdf]

Supplemental Information for  
**Sublingual immune cell clusters and dendritic cell  
distribution in the oral cavity**

**Supplemental Figure 1. Expression of YFP, CD11c, and MHC class II in sublingual cells.**

**Supplemental Figure 2. Detection of YFP<sup>+</sup> cells in the sublingual region of CD11c-YFP mice.**

**Supplemental Figure 3. Fluorescence images of sublingual tongue in CD11c-YFP mouse and wild type mouse.**

**Supplemental Figure 4. Differential distribution of DCs in the oral cavity of CD11c-YFP mice. Related to Figure 1.**

**Supplemental Figure 5. CD11c<sup>+</sup> cells in anterior region in dorsal surface of tongue. Related to Figure 2.**

**Supplemental Figure 6. Numbers of DC clusters in sublingual posterior regions at each week of age. Related to Figure 4.**

**Supplemental Figure 7. Gating strategy for sublingual DCs in CD11c-KikGR mice. Related to Figure 5.**

**Supplemental Figure 8. Gating strategy for flow cytometric analysis and chimerism rates of sublingual T cells in hCD2/CD52-Foxp3/KikGR mouse bone marrow chimera mice. Related to Figure 7 and 8.**

**Supplemental Figure 9. Most CD8<sup>+</sup> T cells are located in epithelium in sublingual DC clusters. Related to Figure 7F, G.**

**Supplemental Figure 10. Image of B cell-lineage cells in sublingual mucosa.**

**Supplemental Figure 11. Flow cytometric analysis of ILCs in SLICs in sublingual tissue.**

**Supplemental Table 1: DC subsets and functions in human and mouse**

**Supplemental Table 2: Antibodies for Flow cytometry.**

Supplemental Information for  
**Sublingual immune cell clusters and dendritic cell  
distribution in the oral cavity**

**Supplemental Movie 1. DCs in the mucosa of dorsal tongue of CD11c-YFP mouse. Related to Figure 2A and Supplemental Figure 5.**

**Supplemental Movie 2. LCs in the sublingual epithelium with significantly longer dendrites. Related to Figure 4G.**

**Supplemental Movie 3. DC cluster in the sublingual mucosa comprised DCs with short dendrites. Related to Figure 4I.**

**Supplemental Movie 4. Scattered XCR1<sup>+</sup>KikGR cells and YFP<sup>+</sup> cells in the sublingual mucosa of CD11c-YFP/XCR1-KikGR mouse. Related to Figure 6B.**

**Supplemental Movie 5. The distribution of XCR1<sup>+</sup> cells and YFP<sup>+</sup> cells in the sublingual DC cluster of a CD11c-YFP/XCR1-KikGR mouse. Related to Figure 6C.**

**Supplemental Movie 6. The distribution of XCR1<sup>+</sup> cells and YFP<sup>+</sup> cells in the sublingual DC cluster of a CD11c-YFP/XCR1-KikGR mouse. Related to Figure 6D.**

**Supplemental Movie 7. Immunohistostaining of CD4<sup>+</sup> cells and CD5<sup>+</sup> cells in the sublingual DC cluster of CD11c-YFP mouse. Related to Figure 7C, D.**

**Supplemental Movie 8. Immunohistostaining of CD8<sup>+</sup> cells and CD5<sup>+</sup> cells in the sublingual DC cluster of a CD11c-YFP mouse. Related to Figure 7F, G.**

**Supplemental Movie 9. Immunohistostaining of CD8<sup>+</sup> cells and CD5<sup>+</sup> cells in the sublingual DC cluster of CD11c-YFP mouse. Related to Supplemental Figure 9.**

**Supplemental Movie 10. Immunofluorescence staining of CD4<sup>+</sup> cells and CD8<sup>+</sup> cells in the immune cell cluster of CD11c-YFP mouse tongue after DNFB application. Related to Figure 9D.**

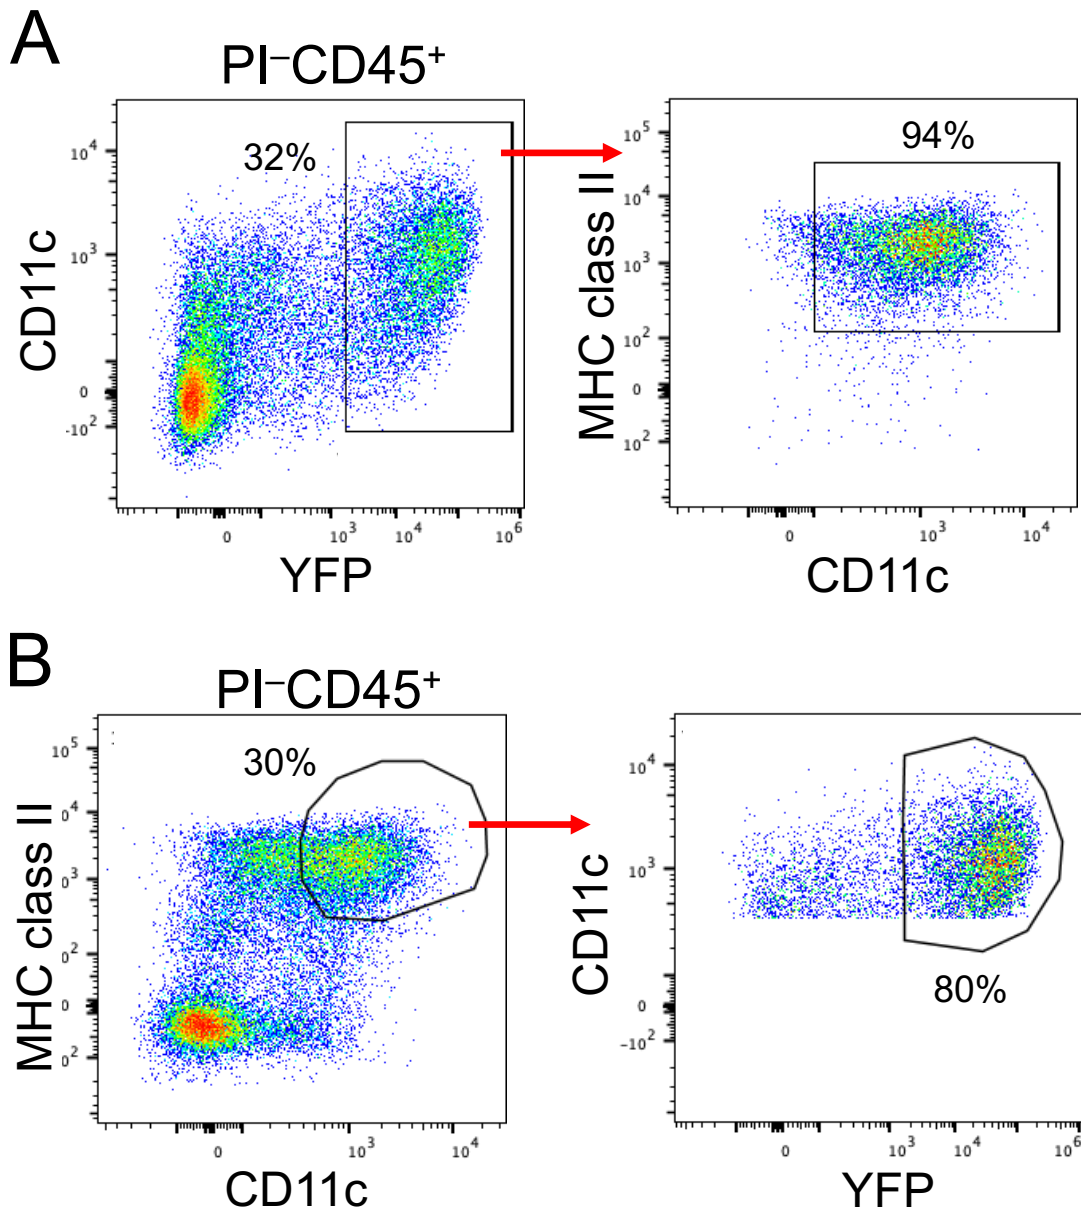

**Supplemental Figure 1. Expression of YFP, CD11c, and MHC class II in sublingual cells.** Single-cell suspensions prepared from the sublingual region were stained with Phycoerythrin/Cy5-conjugated anti-CD45, Brilliant Violet 410-conjugated anti-CD11c, and Brilliant Violet 510 conjugated anti-MHC class II mAbs. **(A)** YFP<sup>+</sup> cells in sublingual cells express CD11c and MHC class II. **(B)** Expression of YFP in CD11c<sup>+</sup>MHC class II<sup>+</sup> sublingual cells. The numbers indicate the frequencies of the gated population of parent cells. The data are representative of at least three independent experiments.

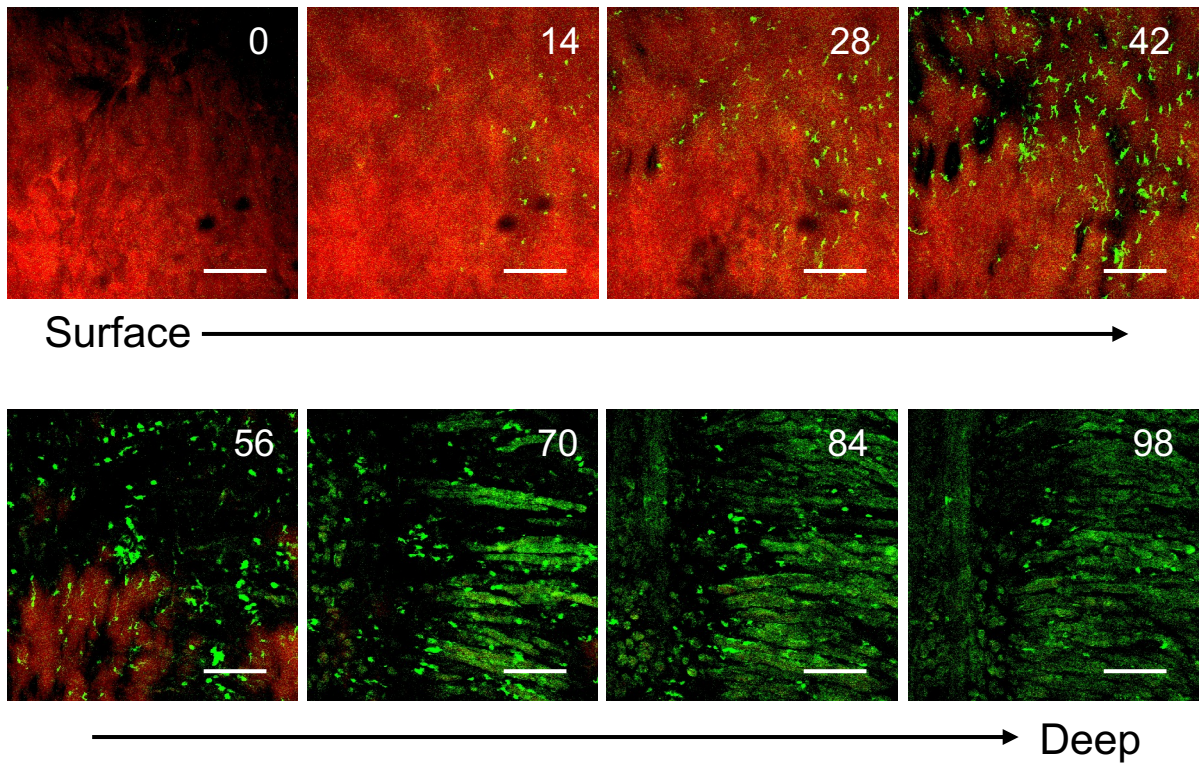

**Supplemental Figure 2. Detection of YFP<sup>+</sup> cells in the sublingual region of CD11c-YFP mice.** CD11c<sup>+</sup> cells in the sublingual mucosa were observed using fluorescence stereoscopic microscopy. z-stack images from the mucosal surface to muscle layer. CD11c-YFP (green), autofluorescence (red). Numbers in images indicate depth (μm) from the surface. The data are representative of at least three independent experiments. Scale bars = 100 μm.

CD11c-YFP mouse

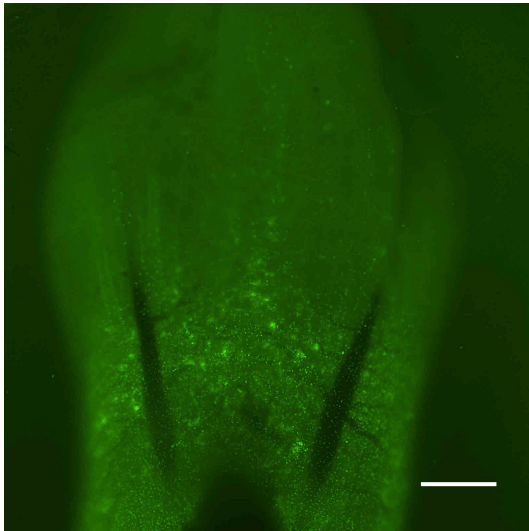

Wild type mouse

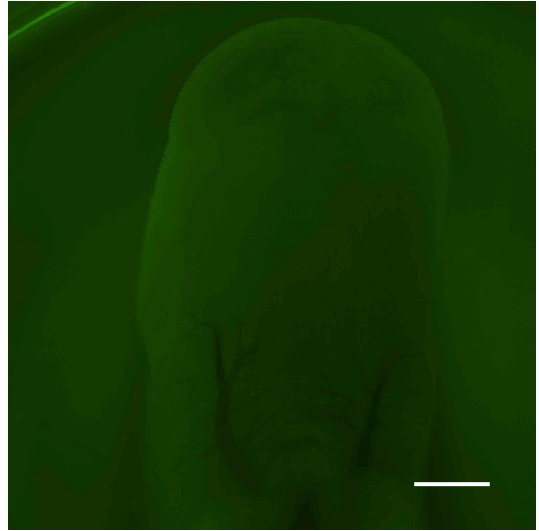

**Supplemental Figure 3. Fluorescence images of sublingual tongue in CD11c-YFP mouse and wild type mouse.**

Fluorescence signal of sublingual region of CD11c-YFP mouse (left panel) and wild type mouse (right panel) acquired by the same setting via GFP channel by fluorescence stereoscopic microscopy. The data are representative of at least three independent experiments. Scale bars = 1 mm.

## Dorsal tongue

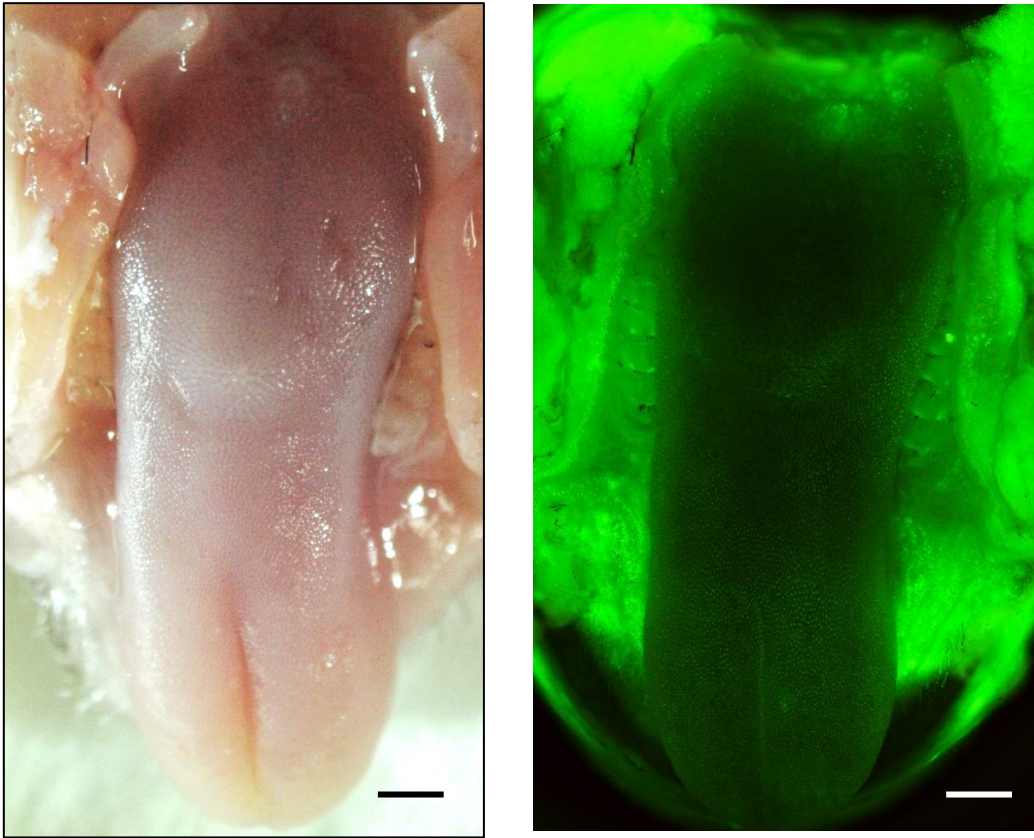

**Supplemental Figure 4. Differential distribution of DCs in the oral cavity of CD11c-YFP mice. Related to Figure 1.**

Bright-field image (left panels) and fluorescence image (right panel) acquired using fluorescence stereoscopic microscopy. Dorsal mucosa of the tongue. The data are representative of at least three independent experiments. Scale bars = 1 mm.



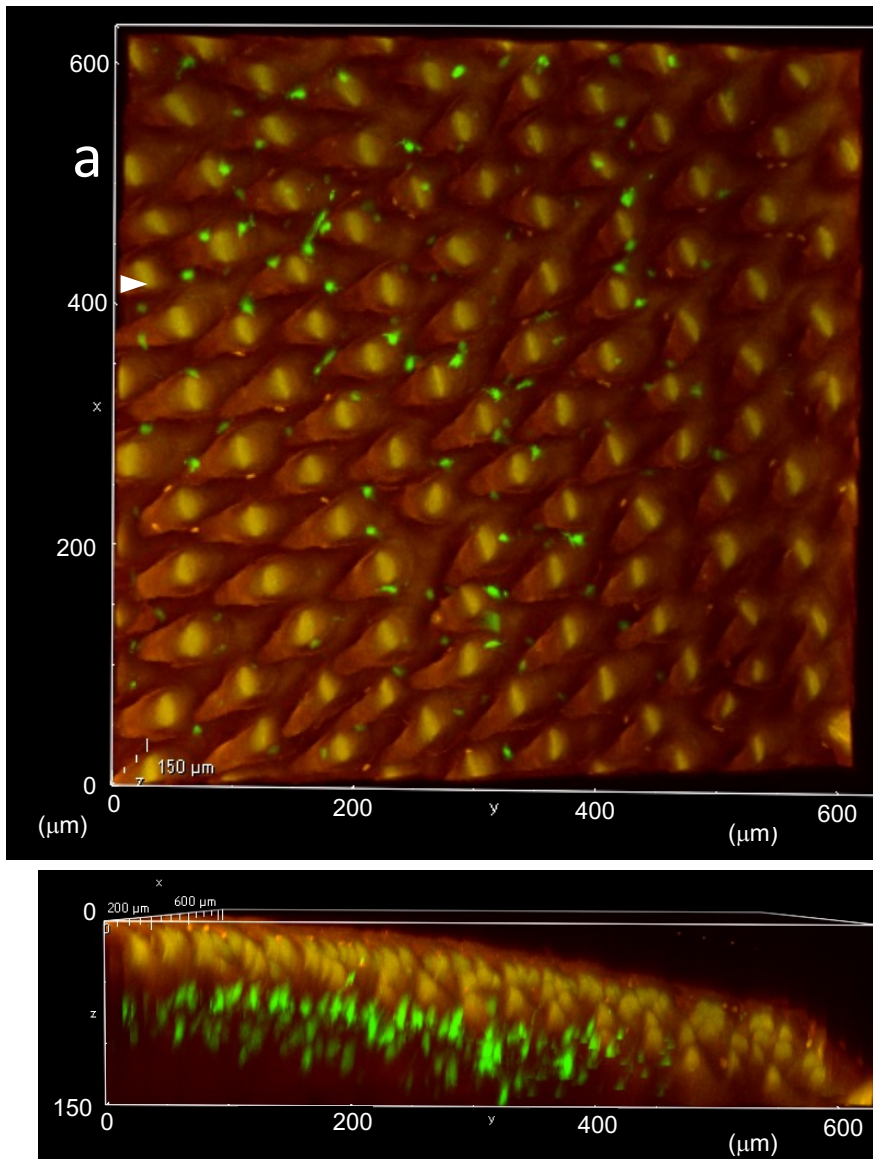

**Supplemental Figure 5. CD11c<sup>+</sup> cells in anterior region in dorsal surface of tongue. Related to Figure 2.** Fluorescence images of DCs in the anterior region of dorsal surface of tongue in CD11c-YFP mice. Vertical image (upper panel) and sagittal image (lower panel) of cleared tongue (Supplemental Movie 1). The data are representative of at least three independent experiments.

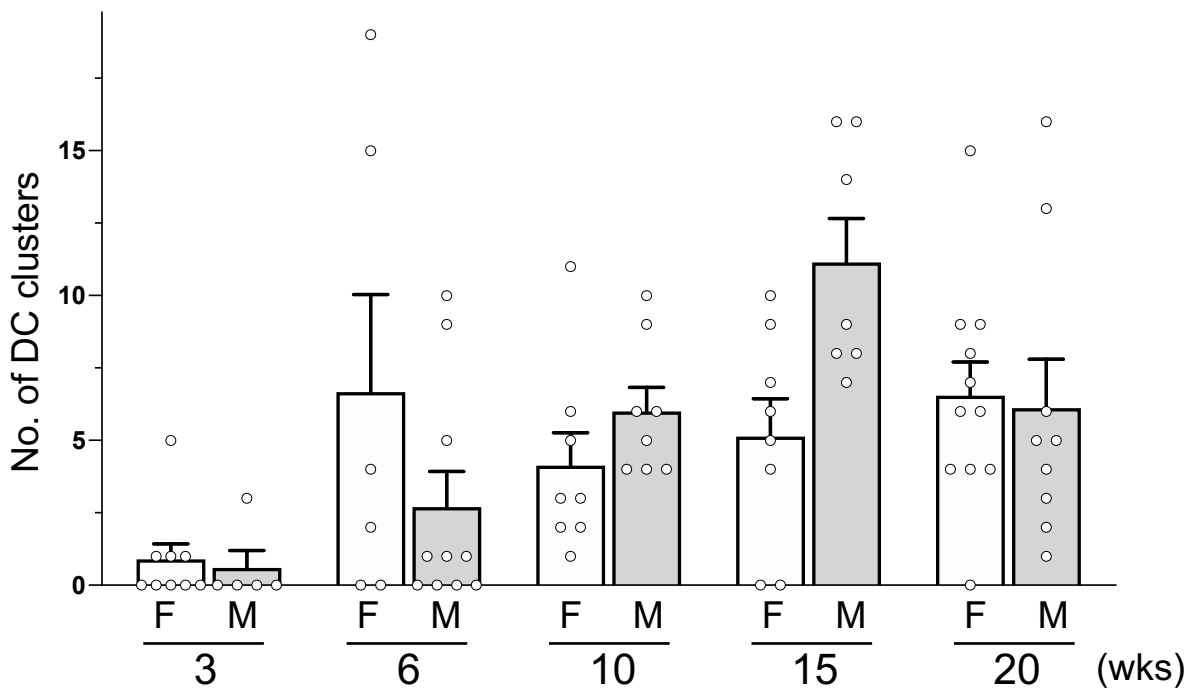

**Supplemental Figure 6. Numbers of DC clusters in sublingual posterior regions at each week of age. Related to Figure 4.**

Number of DC clusters in posterior regions at weeks of age were counted.

Data represent mean  $\pm$  SE ( $n \geq 5$ ). F: female, M: male.



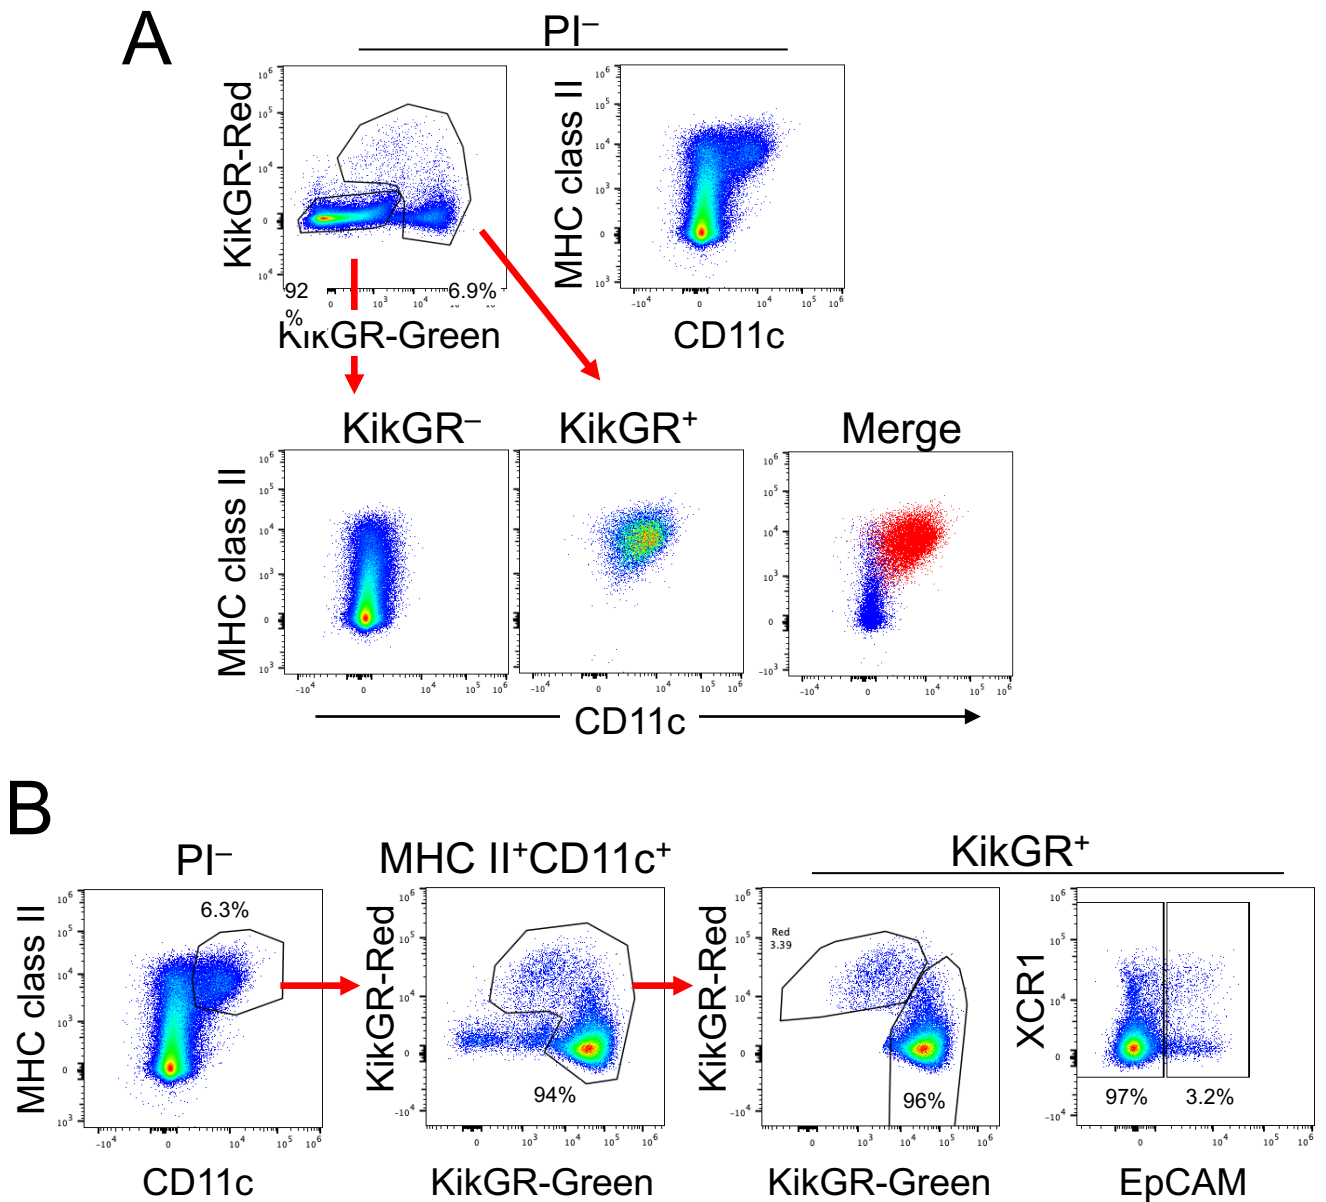

**Supplemental Figure 7. Gating strategy for sublingual DCs in CD11c-KikGR mice. Related to Figure 5.** Gating strategy of flow cytometric analysis of sublingual cells in CD11c-KikGR mice. (A) CD11c<sup>+</sup> cells specifically express KikGR in CD11c-KikGR mice. (B) Sublingual DCs in CD11c-KikGR mice. The numbers indicate the frequencies of the gated population of parent cells. The data are representative of at least three independent experiments.

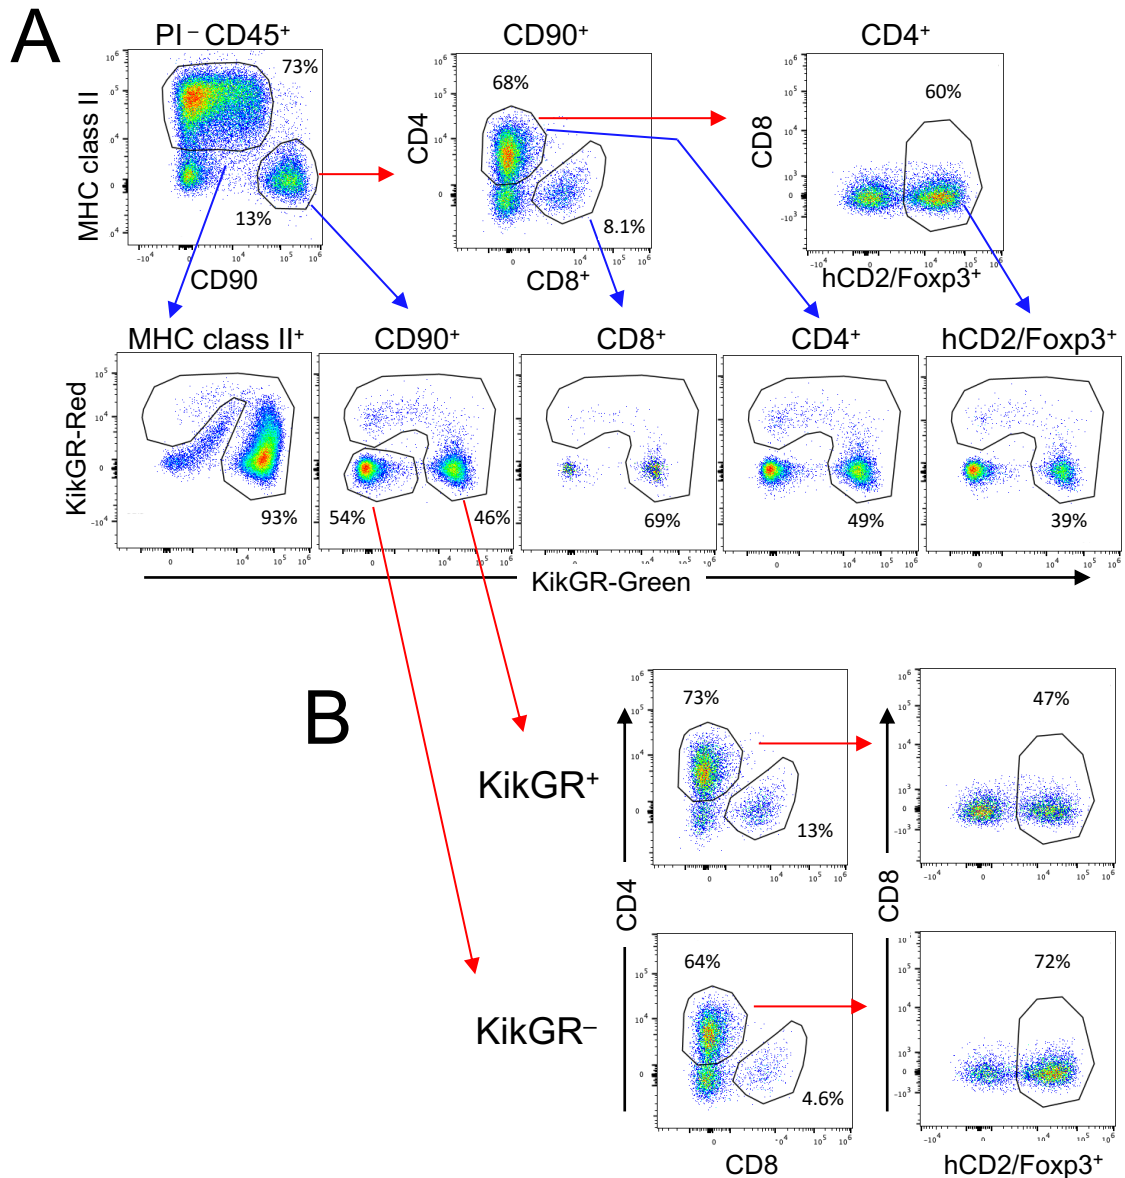

**Supplemental Figure 8. Gating strategy for flow cytometric analysis and chimerism rates of sublingual T cells in hCD2/CD52-Foxp3/KikGR mouse bone marrow chimera mice. Related to Figure 7 and 8. (A)** Gating strategy for chimerism rates of sublingual cells. Sublingual PI-CD45<sup>+</sup> cells of hCD2/CD52-Foxp3/KikGR mouse bone marrow chimera mice were gated to MHC class II<sup>+</sup> cells and CD90<sup>+</sup> cells. CD90<sup>+</sup> cells were further gated to show CD8<sup>+</sup> cells and CD4<sup>+</sup> cells, and CD4<sup>+</sup> cells were gated to show hCD2/Foxp3<sup>+</sup> cells (upper panel). The proportions of donor-derived KikGR<sup>+</sup> cells and host-derived KikGR<sup>-</sup> cells in each gated subset are shown (lower panel). **(B)** Proportions of CD8<sup>+</sup> cells, CD4<sup>+</sup> cells, and hCD2/Foxp3<sup>+</sup> cells in donor-derived KikGR<sup>+</sup> cells and host-derived KikGR<sup>-</sup> cells. The numbers indicate the frequencies of the gated population of parent cells. The data are representatives of at least three independent experiments.

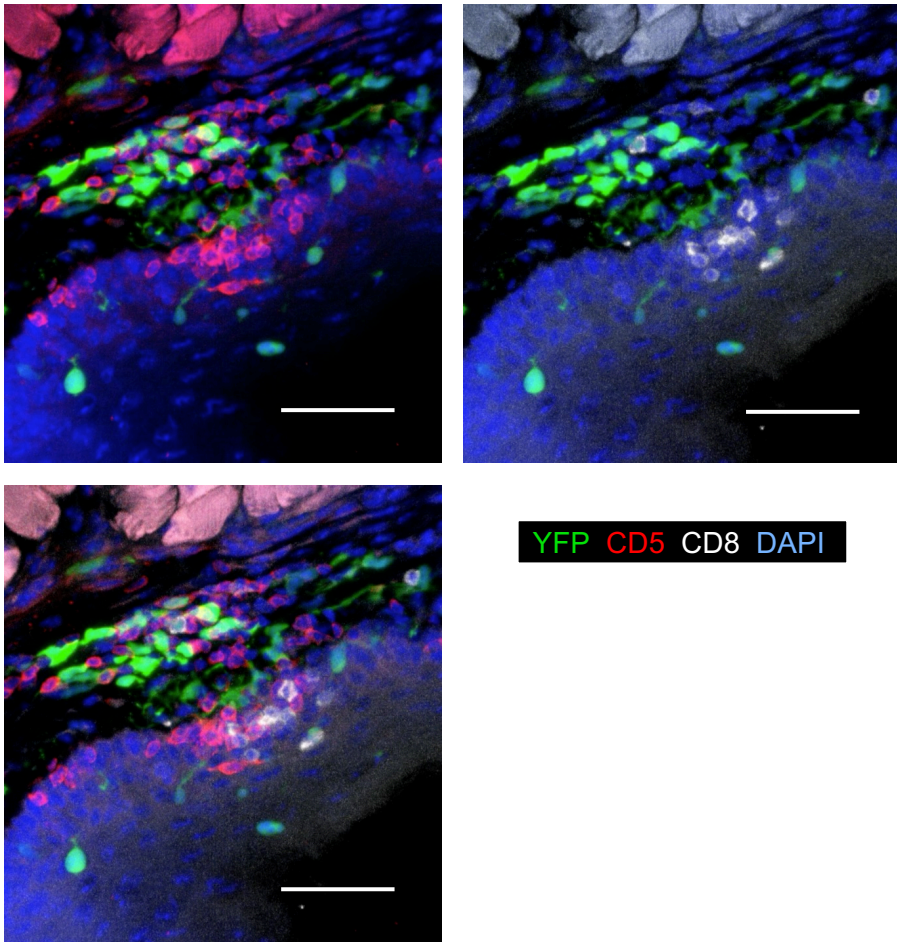

**Supplemental Figure 9. Most CD8<sup>+</sup> T cells are located in epithelium in sublingual DC clusters. Related to Figure 7F, G.** Images of a frozen section from sublingual tissue stained with APC conjugated anti-CD8 mAb (white), PE-conjugated anti-CD5(red), and DAPI (blue) (Supplemental Movie 9). The data are representatives of at least three independent experiments. Scale bars = 50  $\mu$ m.

**Supplemental Movie 9 Immunohistostaining of CD8<sup>+</sup> cells and CD5<sup>+</sup> cells in the sublingual DC cluster of CD11c-YFP mouse. Related to Supplemental Figure 9.**

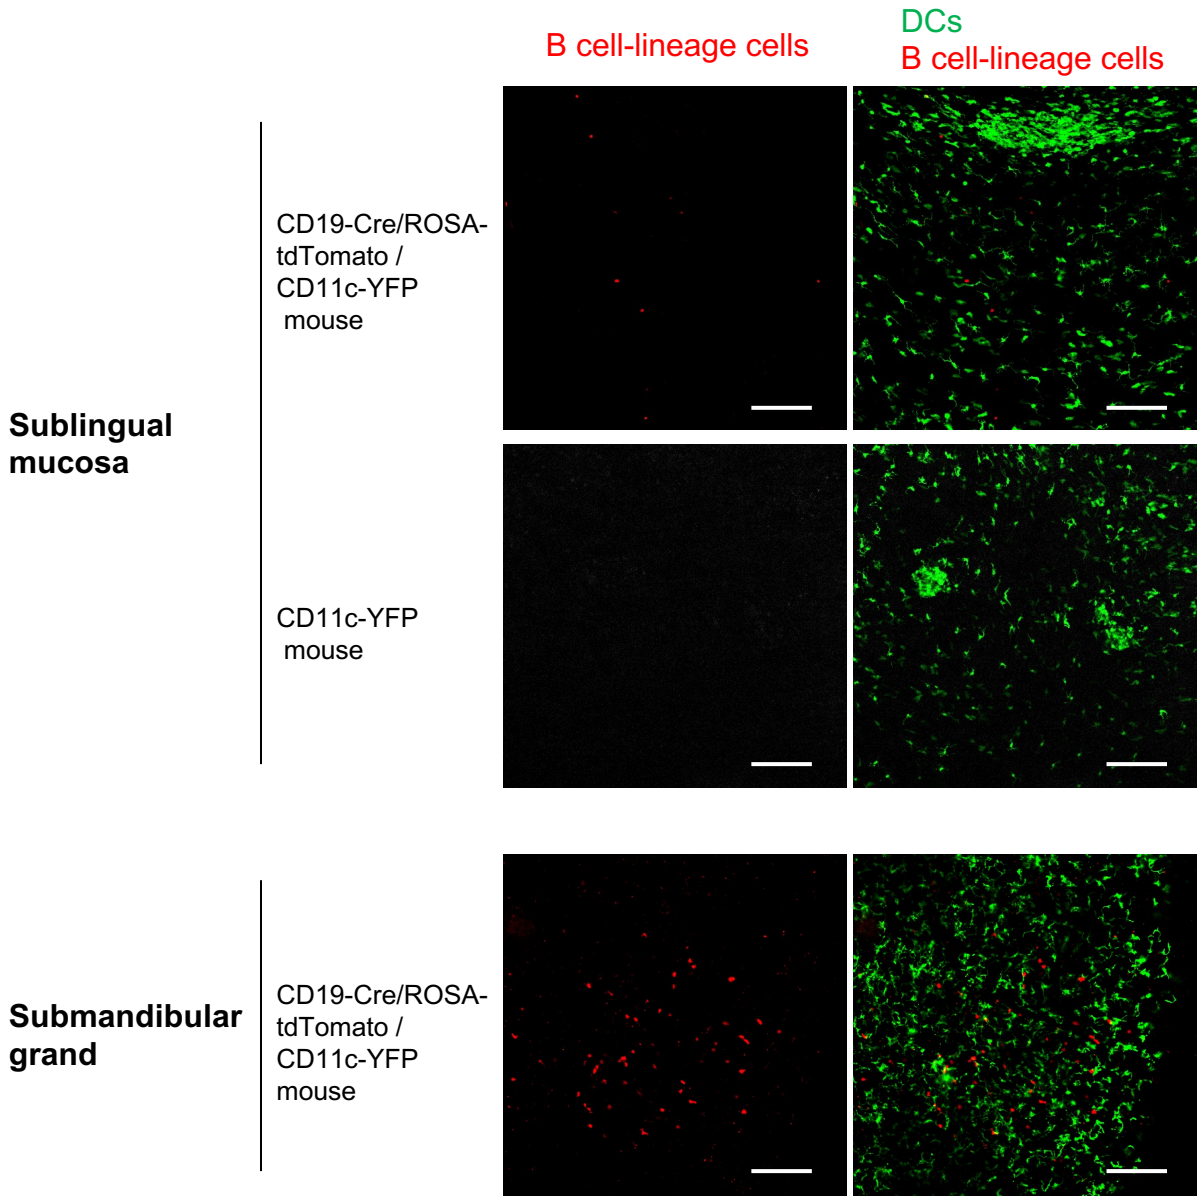

**Supplemental Figure 10. Distribution of B cell-lineage cells in sublingual mucosa.**

Extended depth of focus images were assembled from z-images of sublingual mucosa or submandibular gland of CD19-Cre/tdTomato/CD11c-YFP mouse or CD11c-YFP mouse. The data are representatives of at least three independent experiments. Scale bars = 100  $\mu$ m.

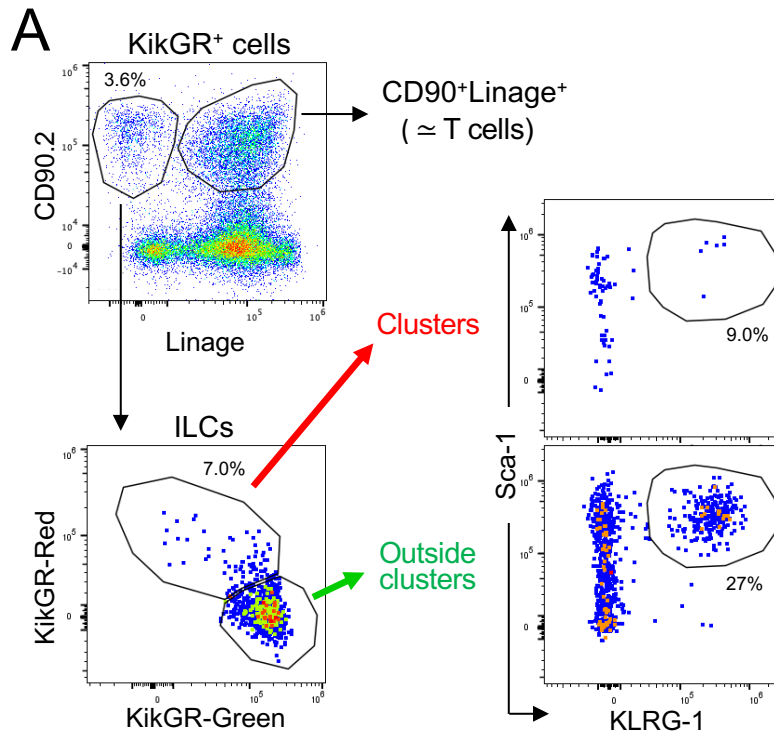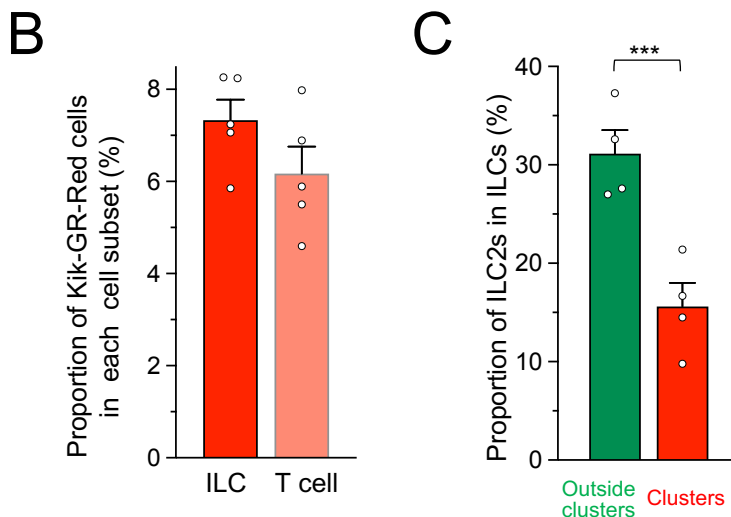

**Supplemental Figure 11 Flow cytometric analysis of ILCs in SLICs in sublingual tissue.** Sublingual KikGR<sup>+</sup> DC-clusters in hCD2/CD52-Foxp3/KikGR mouse bone marrow chimera mice were photo-labeled as similar to Figure 5A and single cell suspension was stained with fluorochrome antibodies. (A) Representative flow cytometry gating strategy for lineage<sup>-</sup>CD90<sup>+</sup> cells (ILCs) and CD90<sup>+</sup>Linage<sup>+</sup> cells (T cells) in sublingual cells. (B) Proportion of KikGR-Red cells in ILCs, ILC2s, and T cells. (C) Proportion of ILC2s in ILCs in KikGR-Green and KikGR-Red cells. Data represent mean  $\pm$  SE (n = 5). Statistical comparisons were performed using the Unpaired t-test (\*\*\*)  $p < 0.001$ . Lineage = CD4, CD8 $\alpha$ , CD5, CD11b, B220, Ly6/Ly6G (Gr-1), Ter-119.

**Supplemental Table 1: DC subsets and functions in human and mouse**

|              |                                          |                                                                              |                                 |
|--------------|------------------------------------------|------------------------------------------------------------------------------|---------------------------------|
|              | Langerhans cells (LC)                    | XCR1 <sup>+</sup> DC (cDC1)                                                  | CD11b <sup>+</sup> DC           |
| Localization | Epithelial layer                         | Lamina proplia                                                               |                                 |
| Function     | Intake antigen outside of tight junction | APC for CD8 <sup>+</sup> T cell, cross presentation, partially Th1 induction | APC for CD4 <sup>+</sup> T cell |

**Molecular marker**

|       |                              |   |   |   |   |
|-------|------------------------------|---|---|---|---|
| Mouse | EpCAM (CD326)<br>CD1a, CD205 | + |   | - |   |
|       | CD11b                        | - | + | - | + |
|       | XCR1                         | + | - | + | - |
|       | CD103                        | + | - | + | - |
|       | Langerin(CD207)              | + |   | + | - |
|       | CD8 $\alpha$                 | - |   | + | - |

|       |                                              |   |  |                                                           |                                                                  |
|-------|----------------------------------------------|---|--|-----------------------------------------------------------|------------------------------------------------------------------|
| Human | CD207,<br>E-cadherin, CD1a,<br>EpCAM (CD326) | + |  | -                                                         |                                                                  |
|       | CD141 (BDCA3)                                |   |  | +                                                         | -                                                                |
|       | CD11b                                        |   |  | -                                                         | +                                                                |
|       | other positive markers                       |   |  | CLER9A<br>CADM1<br>XCR1<br>BTLA<br>CD26<br>DNAM-1 (CD226) | CD2<br>FCER1<br>SIRPA (CD172A)<br>ILT1<br>DCIR/CLEC4A<br>CLEC10A |



**Supplemental Table 2: Antibodies for Flow cytometry**

| molecule        | clone       | fluorochrome         | manufacturer  |
|-----------------|-------------|----------------------|---------------|
| CD4             | RK4-5       | APC/Cy7              | BioLegend     |
|                 | GK5.1       | PE                   | BioLegend     |
|                 |             | Alexa Flour 700      | BioLegend     |
| CD5             | 53-7.3      | PE                   | BioLegend     |
|                 |             | Alexa Flour 700      | BioLegend     |
| CD8a            | 53-6.7      | PE/Cy7               | BioLegend     |
|                 |             | APC                  | BioLegend     |
|                 |             | Alexa Flour 700      | BioLegend     |
| CD11b           | M1/70       | PE/Cy5               | BioLegend     |
|                 |             | Alexa Flour 700      | BioLegend     |
| CD11c           | N418        | PE-Dazzle 594        | BioLegend     |
| CD19            | 6D5         | PE-Dazzle 594        | BioLegend     |
| CD38            | 90          | PE/Cy7               | BioLegend     |
| CD44            | IM7         | FITC                 | BD Phramingen |
| CD45            | 30-F11      | Brilliant Violet 510 | BioLegend     |
| CD45R(B220)     | RA3-6B2     | APC/Cy7              | BioLegend     |
| CD62L           | MEL-14      | PE                   | BD Phramingen |
| CD69            | H1.2F3      | Brilliant Violet 421 | BioLegend     |
| CD80            | 16-10A1     | APC                  | BioLegend     |
| CD90.2          | 53-2.1      | APC                  | eBioscience   |
|                 |             | pacific blue         | BioLegend     |
| CD103           | M290        | APC-R700             | BD Phramingen |
| CD127           | A7R34       | APC                  | eBioscience   |
| CD138           | 281-2       | Brilliant Violet 421 | BioLegend     |
| CD326           | G8.8        | APC/Cy7              | BioLegend     |
| Foxp3           | FJK-16s     | APC                  | eBioscience   |
| GL7             | GL7         | Pacific Blue         | BioLegend     |
| Gr-1(Ly6C/Ly6G) | RB6-8C5     | Alexa Flour 700      | BioLegend     |
| I-A/I-E         | M5/114.15.2 | Brilliant Violet 510 | BioLegend     |
| IgA             | mA-6E1      | PE                   | Invitrogen    |
| KLRG1(MAFA)     | 2F1/KLRG1   | Brilliant Violet 421 | BioLegend     |
| Sca1(Ly6A/Ly6E) | D7          | PE/Cy5               | BioLegend     |
| TCRgd           | UC7-13D5    | Alexa Flour 647      | BioLegend     |
| Ter-119         | TER-119     | Alexa Flour 700      | BioLegend     |
| XCR1            | ZET         | Brilliant Violet 421 | BioLegend     |
| human CD2       | RPA-2.10    | Brilliant Violet 421 | BioLegend     |
|                 |             | PE/Cy5               | BioLegend     |
